# Supplementary material for: Facile engineering of TiO2@Pd based hybrid heterogeneous nanostructures for enhanced NO2 gas sensing at room temperature under UV activation
Source: Royal Society of Chemistry journal article supplement (doi:10.1039/d4nr03213f), 2024-01-01
Supplement: d4nr03213f1.pdf [file d4nr03213f1.pdf]

## Supporting Information

### **Facile Engineering of TiO<sub>2</sub>@Pd Based Hybrid Heterogeneous Nanostructures for Enhanced NO<sub>2</sub> Gas Sensing at Room Temperature under UV Activation**

Thi Minh Thu Pham<sup>a#</sup>, Kedhareswara Sairam Pasupuleti<sup>b#</sup>, Tae Hyeon Jeong<sup>a,c</sup>, Seung Min Lee<sup>a</sup>, Thi Hong Men Nguyen<sup>a</sup>, Moon-Deock Kim<sup>b,d\*</sup>, Young Heon Kim<sup>a\*</sup>

<sup>a</sup>*Graduate School of Analytical Science and Technology (GRAST), Chungnam National University, 99 Daehak-ro, Yuseong-gu, Daejeon 34134, Republic of Korea.*

<sup>b</sup>*Institute of Quantum Systems (IQS), Chungnam National University, 99 Daehak-ro, Yuseong-gu, Daejeon, 34134, Republic of Korea.*

<sup>c</sup>*Center for Research Facilities, Pukyong National University, 45 Yongso-ro, Nam-gu, Busan 48513, Republic of Korea.*

<sup>d</sup>*Department of Physics, Chungnam National University, 99 Daehak-ro, Yuseong-gu, Daejeon 34134, Republic of Korea.*

<sup>#</sup>These authors contributed equally to this work.

\*Corresponding author. E-mail: [y.h.kim@cnu.ac.kr](mailto:y.h.kim@cnu.ac.kr)

## Synthesis mechanism of porous TiO<sub>2</sub>@Pd Hybrid HNs formation

The formation of porous TiO<sub>2</sub> Ns through mesocrystals involved several steps, as follows. Initially, TBT and AA react, resulting in AA coordination to titanium centers and the formation of uncertain titanium acetate complexes ((CH<sub>3</sub>COO)<sub>x</sub>Ti(OC<sub>4</sub>H<sub>9</sub>)<sub>4-x</sub>) through a ligand exchange. As a byproduct of this reaction process, C<sub>4</sub>H<sub>9</sub>OH (butanol) was released, and the produced C<sub>4</sub>H<sub>9</sub>OH can react via a slow esterification reaction, resulting in water molecules. Further, when the hydrolysis-condensation and nonhydrolytic condensation processes occur, TiO<sub>2</sub> Ns are formed in the form of crystallized round spherical beads with soft silky fibers running along their surface with Ti-O-Ti surficial bonds. Further, the organic residuals in the as-obtained product were removed by calcination at 450 °C for 3 hours to obtain nanoporous TiO<sub>2</sub> Ns. This step can effectively remove any other remaining organic components and facilitate the development of a porous structure in the TiO<sub>2</sub> Ns.

The growth of Pd NPs on the porous TiO<sub>2</sub> Ns surfaces to form porous TiO<sub>2</sub>@Pd HNs was readily achieved in aqueous medium at 90 °C using H<sub>2</sub>PdCl<sub>4</sub> and LAA as the Pd precursor and mild reducing reagent, respectively. CTAB is a highly well-liked and commonly utilized stabilizing chemical for the production of hybrid structures as well as during the reduction of Pd<sup>2+</sup>. The use of CTAB results in the formation of single-crystalline Pd NPs encapsulating over the TiO<sub>2</sub> Ns surface. Further, the in-situ growth of Pd NPs on the TiO<sub>2</sub> Ns may cause the lattice mismatch between the two materials, resulting in more defect states that may reduce the sensing capabilities of the TiO<sub>2</sub>@Pd HNs. To overcome this lattice mismatch and promote the growth of uniform Pd NPs, a CTAB wetting film must be established at the TiO<sub>2</sub> and Pd interface. Typically, this wetting film is formed by the formation of a molecular bilayer of surfactants on the surface of the seed material. Moreover, the CTAB can be used as a critical strategy for the successful growth of Pd NPs to avoid the effect of lattice mismatch between the Pd NPs and TiO<sub>2</sub> Ns by carefully controlling the reduction process of the metal precursors.

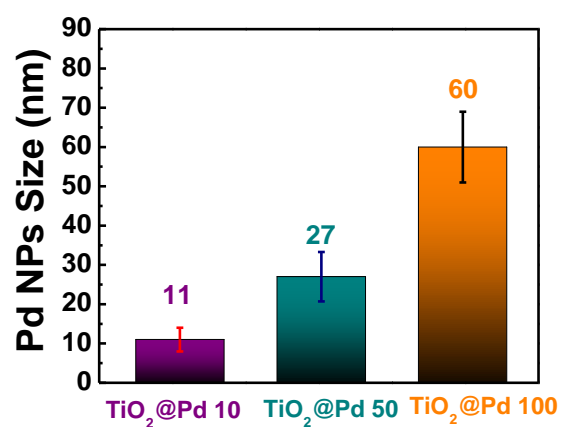

**Figure S1.** (a) The bar chart shows the Pd NPs size distribution over the TiO<sub>2</sub>@Pd 10, 50, and 100 HNs samples.

**Table S1.** BET surface area and pore size of the as-prepared samples.

| <b>Sample</b>                     | <b>Surface area (m<sup>2</sup>/g)</b> | <b>Pore diameter (nm)</b> |
|-----------------------------------|---------------------------------------|---------------------------|
| <b>Bare TiO<sub>2</sub></b>       | 86.54                                 | 13.6                      |
| <b>TiO<sub>2</sub>@Pd 10 HNs</b>  | 129.36                                | 15.4                      |
| <b>TiO<sub>2</sub>@Pd 50 HNs</b>  | 164.91                                | 21.4                      |
| <b>TiO<sub>2</sub>@Pd 100 HNs</b> | 156.68                                | 20.1                      |

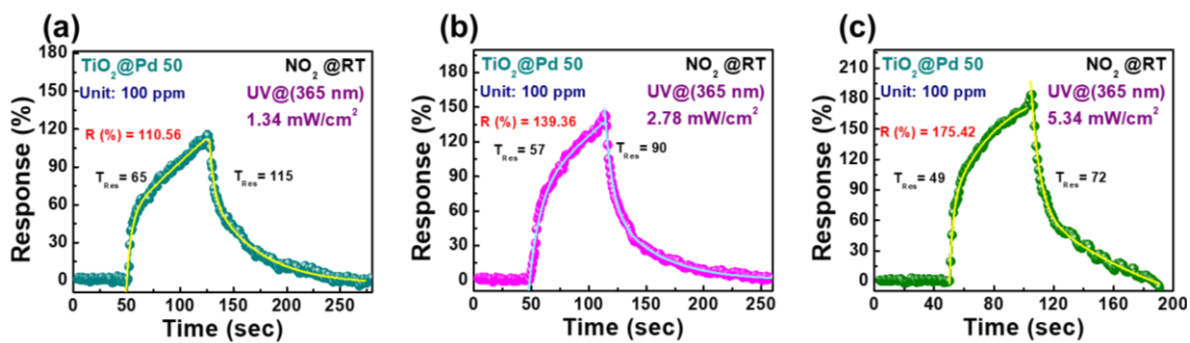

**Figure S2.** (a-c) The dynamic transient sensing response curves of the optimized TiO<sub>2</sub>@Pd 50 HNs towards NO<sub>2</sub> (100 ppm) gas measured under different power densities (1.34, 2.78, and 5.34 mW/cm<sup>2</sup>) of UV light (365 nm) at RT.

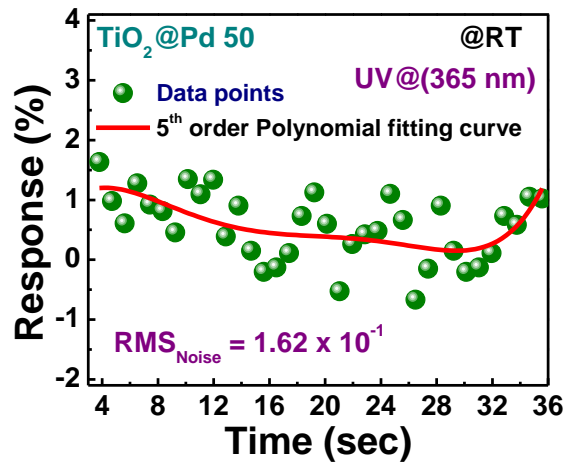

**Figure S3.** (a) 5<sup>th</sup> order polynomial fitting curves of the TiO<sub>2</sub>@Pd 50 HNs sensor measured under UV@365 nm at RT (Note: the data point which we had used only the point when the sensor was in the air).

## Determination of the theoretical detection limit

As per the IUPAC calculations, the theoretical detection limit (DL) of the as-prepared sensors was estimated using a well-documented formula (Eq. S1) as given below.

$$DL (ppb) = 3 \left( \frac{RMS_{noise}}{Slope} \right) \text{---} \text{---} \text{---} (S1)$$

Where the  $RMS_{noise}$  is the root mean square noise, which is estimated from the base noise level of the sensor's response/resistance points under air ambient. By using 5<sup>th</sup>-order polynomial fitting curves to the set of points displayed in Figure S2, the  $RMS_{noise}$  was calculated.

$$RMS_{noise} = \sqrt{R^2 / N} \text{---} \text{---} \text{---} (S2)$$

Here R and N were denoted as  $R = \sum_{t=4}^{36} (R_i + R_f)^2 \text{---} \text{---} \text{---} (S3)$ , and several points to be considered from the graph (N=32).

The slope was calculated from the linear fitting curves for the sensor's responses measured against different ppm concentration levels of the target gas. Upon substituting the slope and  $RMS_{noise}$  values in the above-mentioned equations, the calculated DL of the hybrid  $TiO_2@Pd$  50 HNs sensor was found to be 82 ppb under UV light activation. Similarly, calculations have been used to estimate the DL of the hybrid  $TiO_2@Pd$  50 HNs (DL~302 ppb) and pristine  $TiO_2$  Ns (DL~946 ppb) sensors under dark conditions as presented in Table S2.

**Table S2.** Estimated detection limit TiO<sub>2</sub>@Pd 50 hybrid HNs sensor measured under dark and UV@365 nm light illumination at RT.

| <b>S.NO</b> | <b>Samples</b>                                 | <b>Detection limit (DL~ppb)</b> |
|-------------|------------------------------------------------|---------------------------------|
| <b>1.</b>   | <b>TiO<sub>2</sub>@Pd 50 HNs (UV (365 nm))</b> | <b>~82 ppb</b>                  |
| <b>2.</b>   | <b>TiO<sub>2</sub>@Pd 50 HNs (dark)</b>        | <b>~302 ppb</b>                 |
| <b>3.</b>   | <b>TiO<sub>2</sub> Ns</b>                      | <b>~946 ppb</b>                 |



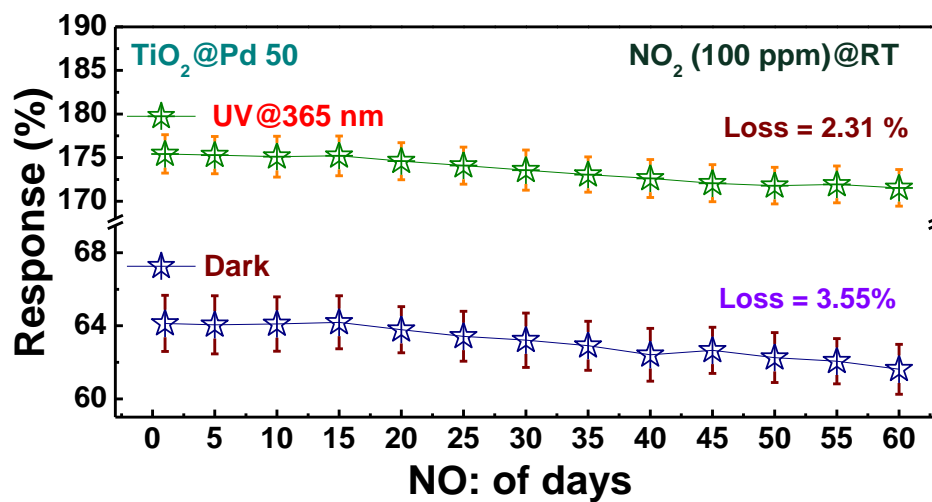

**Figure S4.** (a) Long-term reproducibility test results of TiO<sub>2</sub>@Pd 50 HN sensor measured under dark and UV@365 nm light illumination towards 100 ppm of NO<sub>2</sub> gas at RT.
